# Supplementary material for: A Novel Clinical Nomogram for Predicting Lymph Node Metastasis in Ovarian Cancer: A SEER Analysis and External Validation in a Tertiary Center
Source: Research Square preprint supplement (doi:10.21203/rs.3.rs-1004467/v1), 2021-11-19
Supplement: Supplementary file 1 [file 5232194a704712296a258ce4.docx]

**Supplementary table1 The Collinearity analysis of age, histologic type and grade, and Preoperative serum CA125 level**

| **Model** | **Tolerance** | **VIF** |
| --- | --- | --- |
| Age | 0.951 | 1.052 |
| Histologic type | 0.930 | 1.075 |
| Histologic grade | 0.914 | 1.094 |
| Preoperative serum CA125 level | 0.974 | 1.027 |
